# Supplementary material for: Redox enzyme-mimicking activities of CeO2 nanostructures: Intrinsic influence of exposed facets
Source: PubMed Central journal article supplement (PMC5066218; doi:10.1038/srep35344), 2016-10-17
Supplement: srep35344-s1.pdf [file srep35344-s1.pdf]

## Supporting information

# Redox enzyme-mimicking activities of CeO<sub>2</sub> nanostructures: Intrinsic influence of exposed facets

Yushi Yang<sup>1</sup>, Zhou Mao<sup>1</sup>, Wenjie Huang<sup>1</sup>, Lihua Liu<sup>2</sup>, Junli Li<sup>2</sup>, Jialiang Li<sup>3</sup> & Qingzhi Wu<sup>1</sup>

<sup>1</sup>State Key Laboratory of Advanced Technology for Materials Synthesis and Processing, and Biomedical Material and Engineering Center, Wuhan University of Technology, Wuhan 430070, China

<sup>2</sup>School of Chemical Engineering and Life Science, Wuhan University of Technology, Wuhan 430070, China. Correspondence and requests for materials should be addressed to Q.W. (email: wuqzh@whut.edu.cn.)

<sup>3</sup>School of Chemical Engineering, Shangdong University of Technology, Zibo 255000, China  
Correspondence and requests for materials should be addressed to Q.Z.W. (email: wuqzh@whut.edu.cn)

## Michaelise-Menten constant calculations

For the peroxidase mimetic reaction, the Michaelis-Menten kinetic equation was selected to describe the relation between the initial velocities ( $V_{init}$ ) and their relative substrate concentrations.

The concentration of the product was calculated using equation:

$$c = \frac{A}{\varepsilon \cdot \ell}$$

Where,  $c$  is the concentration of  $\text{TMB}_{\text{ox}}$ ,  $A$  is the absorbance measured by the spectrometer,  $\varepsilon$  is the extinction coefficient, and  $\ell$  is the length of the light path. In our experiments,  $\ell = 1$  cm and  $\varepsilon = 3.9 \times 10^4 \text{ M}^{-1}\text{cm}^{-1}$  for  $\text{TMB}_{\text{ox}}$  at  $652 \text{ nm}^1$ . The initial velocity ( $V_{init}$ ) was calculated using equation:

$$V_{init} = \frac{\Delta c}{\Delta t}$$

Where,  $V_{init}$  is the initial reaction velocity,  $c$  is the concentration of  $\text{TMB}_{\text{ox}}$ , and  $t$  is the reaction time. The kinetic parameters,  $K_m$  and  $V_{max}$ , was determined by fitting  $V_{init}$  against substrate concentrations according to the Michaelis-Menten equation. The data points were directly fitted with the equation using Levenberg–Marquardt algorithm.

## Annealing of $\text{CeO}_2$ nanorods and their peroxidase mimetic activities

Fig. S1a and b show the TEM and HRTEM of  $\text{CeO}_2$  nanorods with  $\{110\}$  facets after annealing. It is clear that annealing treatment did not change the morphology and exposed facets of the  $\text{CeO}_2$  nanorods. Fig. S1c shows the Williamson-Hall plots of  $\text{CeO}_2$  nanorods before and after annealing. The fitted line of  $\text{CeO}_2$  nanorods after annealing displayed a zero slope, suggesting that the microstrain existed in the  $\text{CeO}_2$  nanorods disappeared after annealing.

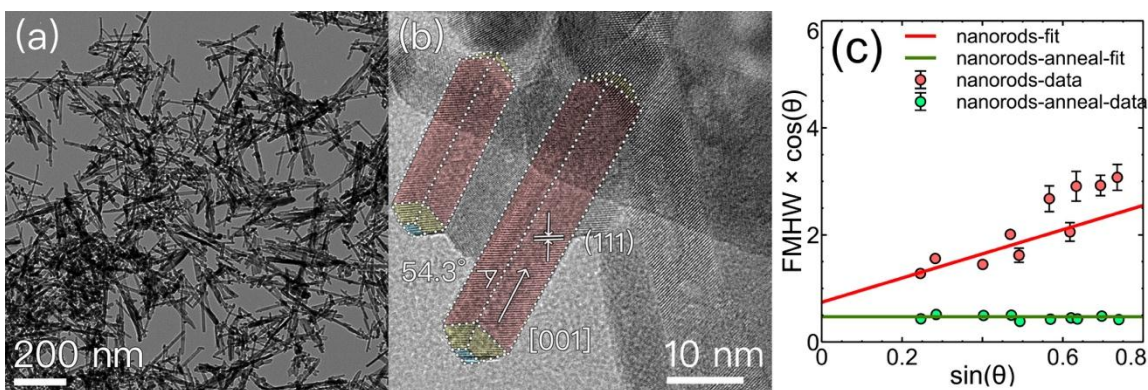

**Figure S1.** a) TEM image shows uniform CeO<sub>2</sub> nanorods; b) HRTEM image shows the exposed {110} facets. The proposed 3D models were outlined in the image; c) Williamson-Hall plot of CeO<sub>2</sub> nanorods before and after annealing. The slope of the line indicates the microstrain (a larger slope represents a larger microstrain), and the intercept indicates the crystallite size (a large intercept means a smaller size).

Fig. S2 shows the peroxidase mimetic activity of CeO<sub>2</sub> nanorods with {110} facets before and after annealing. It is obvious that annealing did not increase the enzyme activity of CeO<sub>2</sub> nanorods, suggesting that the peroxidase mimetic activity of CeO<sub>2</sub> nanorods was independent on the microstrain.

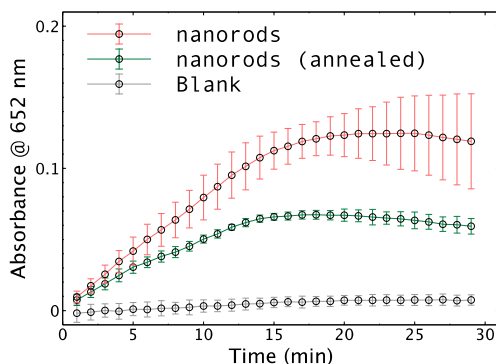

**Figure S2.** Peroxidase mimetic activity of CeO<sub>2</sub> nanorods before and after annealing. The changes in absorbance at 652 nm represents the conversion from TMB to oxidized TMB (TMB<sub>ox</sub>).

## SOD mimetic activities of the CeO<sub>2</sub> nanostructures

Fig. S3 shows the SOD mimetic activity of CeO<sub>2</sub> nanostructures. Compared with the peroxidase-like activities, CeO<sub>2</sub> nanorods with exposed {110} facets exhibited higher SOD mimetic activity than that of CeO<sub>2</sub> nanocubes with exposed {100} facets. The SOD activity of CeO<sub>2</sub> nanorods was 57.1 U/mg, which was 4 times higher than that of CeO<sub>2</sub> nanocubes. The SOD mimetic activity of CeO<sub>2</sub> nanorods was slightly decreased after annealing, but it was still significantly higher than that of CeO<sub>2</sub> nanocubes. These results indicate that the difference in SOD mimetic activity of CeO<sub>2</sub> nanostructures also originated from the exposed facets, instead of the microstrain.

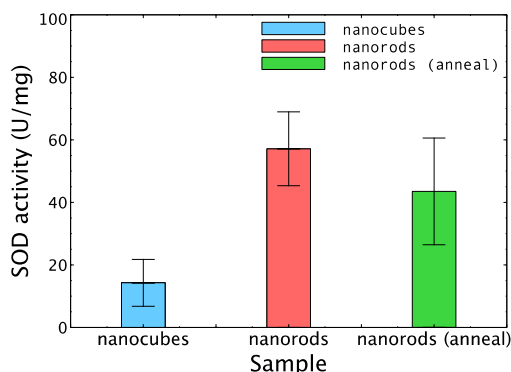

**Figure S3. SOD mimetic activity of CeO<sub>2</sub> nanocubes and CeO<sub>2</sub> nanorods (before and after annealing).**

## Reference

- (1) Josephy, P. D., Eling, T. & Mason, R. P. The Horseradish Peroxidase-Catalyzed Oxidation of 3, 5, 3', 5'-Tetramethylbenzidine. *J. Biol. Chem.* **257**, 3669-3675 (1982).
